# Supplementary material for: Recombinant Zika virus envelope protein elicited protective immunity against Zika virus in immunocompetent mice
Source: PubMed Central journal article supplement (PMC5874044; doi:10.1371/journal.pone.0194860), 2018-03-28
Supplement: pone.0194860.s001.pdf [file pone.0194860.s001.pdf]

S1 Table. Original data for Fig 2

| Fig 2A Ending point dilution |     |          |            |       |       |
|------------------------------|-----|----------|------------|-------|-------|
|                              | PBS | 10µg E80 | 10µg E80 S | 20480 | 40960 |
| mouse 1                      | 1   | 5120     | 10240      | 20480 | 40960 |
| mouse 2                      | 1   | 5120     | 20480      | 20480 | 40960 |
| mouse 3                      | 1   | 10240    | 20480      | 20480 | 40960 |
| mouse 4                      | 1   | 10240    | 40960      | 20480 | 40960 |
| mouse 5                      | 1   | 1280     | 10240      | 40960 | 40960 |

| Fig 2B OD450 |              |          |          |          |          |            |          |          |          |          |            |          |          |          |          |            |          |          |          |          |            |          |          |          |          |
|--------------|--------------|----------|----------|----------|----------|------------|----------|----------|----------|----------|------------|----------|----------|----------|----------|------------|----------|----------|----------|----------|------------|----------|----------|----------|----------|
| 1/dilution   | mouse number | PBS      |          |          |          | 10µg E E80 |          |          |          |          | 50µg E E80 |          |          |          |          | 10µg S E80 |          |          |          |          | 50µg S E80 |          |          |          |          |
|              |              | 1        | 2        | 3        | 4        | 1          | 2        | 3        | 4        | 5        | 1          | 2        | 3        | 4        | 5        | 1          | 2        | 3        | 4        | 5        | 1          | 2        | 3        | 4        | 5        |
| 320          |              | 0.109392 | 0.071933 | 0.150039 | 0.206017 | 1.33375    | 2.55708  | 0.509114 | 2.270295 | 2.155565 | 2.469765   | 2.219875 | 2.64947  | 2.438755 | 3.100225 | 1.850675   | 2.51116  | 2.61679  | 3.0994   | 2.103445 | 2.201535   | 2.47022  | 2.968565 | 2.608495 | 2.737485 |
| 640          |              | 0.07871  | 0.067127 | 0.099779 | 0.118508 | 1.032719   | 2.183985 | 0.345491 | 1.709775 | 1.35698  | 2.01703    | 1.71548  | 2.261515 | 2.71091  | 2.74234  | 1.426025   | 2.649315 | 2.27295  | 2.79767  | 1.764165 | 2.74631    | 2.648265 | 2.70826  | 2.13802  | 2.706005 |
| 1280         |              | 0.073349 | 0.070083 | 0.074906 | 0.080409 | 0.615261   | 1.539725 | 0.216192 | 1.079065 | 0.678176 | 1.43718    | 1.195365 | 1.64979  | 2.57683  | 1.96337  | 0.954428   | 2.26354  | 1.537175 | 2.00263  | 1.221095 | 2.57339    | 2.185715 | 1.971575 | 1.746945 | 2.273205 |
| 2560         |              | 0.084233 | 0.060585 | 0.067437 | 0.069036 | 0.335188   | 0.946502 | 0.13449  | 0.794635 | 0.361582 | 0.942043   | 0.75054  | 0.967103 | 2.45627  | 1.262945 | 0.613959   | 1.74464  | 0.959434 | 1.339955 | 0.738593 | 2.11529    | 1.54285  | 1.335335 | 1.38552  | 1.64867  |
| 5120         |              | 0.065056 | 0.061123 | 0.061106 | 0.068451 | 0.22392    | 0.515502 | 0.095304 | 0.369262 | 0.207046 | 0.569199   | 0.463845 | 0.55114  | 1.73605  | 0.727266 | 0.36574    | 1.08719  | 0.566097 | 0.823866 | 0.433372 | 1.388435   | 0.948853 | 0.841043 | 0.988554 | 1.104615 |
| 10240        |              | 0.06392  | 0.05956  | 0.05768  | 0.058801 | 0.147691   | 0.308367 | 0.077056 | 0.214876 | 0.134022 | 0.352687   | 0.298513 | 0.324523 | 1.03713  | 0.406577 | 0.231489   | 0.668545 | 0.359929 | 0.476497 | 0.253922 | 0.875072   | 0.552802 | 0.473557 | 0.673086 | 0.684155 |
| 20480        |              | 0.061195 | 0.061713 | 0.057123 | 0.057934 | 0.105905   | 0.186775 | 0.065492 | 0.136234 | 0.093775 | 0.216265   | 0.203769 | 0.201279 | 0.593509 | 0.239868 | 0.151773   | 0.385893 | 0.243752 | 0.282189 | 0.154701 | 0.513544   | 0.326315 | 0.302987 | 0.43517  | 0.381723 |
| 40960        |              | 0.065025 | 0.067989 | 0.058291 | 0.059302 | 0.093065   | 0.118715 | 0.061687 | 0.095057 | 0.078541 | 0.150903   | 0.1442   | 0.129534 | 0.325527 | 0.145827 | 0.115443   | 0.230613 | 0.148578 | 0.172756 | 0.098364 | 0.2797     | 0.203009 | 0.180502 | 0.259651 | 0.216417 |

| Fig 2C Ending point dilution |     |          |            |   |
|------------------------------|-----|----------|------------|---|
|                              | PBS | 60µg E80 | 60µg E80 S |   |
| mouse 1                      | 1   | 1        | 1          | 1 |
| mouse 2                      | 1   | 640      | 1          | 1 |
| mouse 3                      | 1   | 1        | 1          | 1 |
| mouse 4                      | 1   | 640      | 640        | 1 |
| mouse 5                      | 1   | 1280     |            |   |

| Fig 2D OD450 |              |          |          |          |          |          |            |          |          |          |          |            |          |          |          |   |  |  |  |  |  |  |  |  |  |
|--------------|--------------|----------|----------|----------|----------|----------|------------|----------|----------|----------|----------|------------|----------|----------|----------|---|--|--|--|--|--|--|--|--|--|
| 1/dilution   | mouse number | PBS      |          |          |          |          | 50µg E80 E |          |          |          |          | 50µg E80 S |          |          |          |   |  |  |  |  |  |  |  |  |  |
|              |              | 1        | 2        | 3        | 4        | 5        | 1          | 2        | 3        | 4        | 5        | 1          | 2        | 3        | 4        | 5 |  |  |  |  |  |  |  |  |  |
| 160          |              | 0.130193 | 0.082676 | 0.084215 | 0.086999 | 0.10922  | 0.270982   | 0.211258 | 0.326215 | 0.127033 | 0.130873 | 0.316562   | 0.703887 | 0.107093 | 0.167144 |   |  |  |  |  |  |  |  |  |  |
| 320          |              | 0.085565 | 0.066929 | 0.06935  | 0.07019  | 0.084451 | 0.237796   | 0.14563  | 0.219033 | 0.092523 | 0.097957 | 0.225303   | 0.494915 | 0.081529 | 0.119559 |   |  |  |  |  |  |  |  |  |  |
| 640          |              | 0.071408 | 0.061066 | 0.06217  | 0.062377 | 0.072484 | 0.168948   | 0.105603 | 0.142548 | 0.086143 | 0.07855  | 0.149344   | 0.310531 | 0.069387 | 0.093614 |   |  |  |  |  |  |  |  |  |  |
| 1280         |              | 0.062418 | 0.058298 | 0.058551 | 0.059171 | 0.065499 | 0.108281   | 0.078239 | 0.098351 | 0.06826  | 0.066606 | 0.109008   | 0.191504 | 0.063505 | 0.077747 |   |  |  |  |  |  |  |  |  |  |
| 2560         |              | 0.0628   | 0.057853 | 0.055709 | 0.056936 | 0.061131 | 0.081121   | 0.068442 | 0.075436 | 0.064447 | 0.059572 | 0.080293   | 0.127925 | 0.060881 | 0.066241 |   |  |  |  |  |  |  |  |  |  |
| 5120         |              | 0.056674 | 0.056372 | 0.065561 | 0.062088 | 0.059518 | 0.065897   | 0.062021 | 0.064255 | 0.061932 | 0.057079 | 0.066402   | 0.09206  | 0.059749 | 0.06317  |   |  |  |  |  |  |  |  |  |  |
| 10240        |              | 0.055786 | 0.058901 | 0.054342 | 0.086758 | 0.059979 | 0.059941   | 0.059074 | 0.059151 | 0.060429 | 0.056521 | 0.06017    | 0.073908 | 0.060423 | 0.062253 |   |  |  |  |  |  |  |  |  |  |
| 20480        |              | 0.057855 | 0.058766 | 0.054424 | 0.054097 | 0.058838 | 0.057504   | 0.058194 | 0.057844 | 0.06055  | 0.056024 | 0.057535   | 0.06545  | 0.059138 | 0.063086 |   |  |  |  |  |  |  |  |  |  |
