# Supplementary material for: Recombinant Zika virus envelope protein elicited protective immunity against Zika virus in immunocompetent mice
Source: PubMed Central journal article supplement (PMC5874044; doi:10.1371/journal.pone.0194860), 2018-03-28
Supplement: pone.0194860.s002.pdf [file pone.0194860.s002.pdf]

S2 Table. Original data for Fig 3

| Fig 3A | PRNT50  |  | PBS  | 10µg E80_E | 10µg E80_S | 50µg E80_E | 50µg E80_S |
|--------|---------|--|------|------------|------------|------------|------------|
|        | mouse 1 |  | 15.9 | 47.4       | 33.2       | 80.3       | 113        |
|        | mouse 2 |  | 19.3 | 99.6       | 63.2       | 55.6       | 118.3      |
|        | mouse 3 |  | 40.4 | 53.4       | 72.7       | 68.6       | 156        |
|        | mouse 4 |  | 13.6 | 79.6       | 31.6       | 220.8      | 208.2      |
|        | mouse 5 |  | 48.4 | 159.6      | 162.1      | 146.5      | 427.3      |

| Fig 3B | Neutralizing activity (%) |              | PBS      |          |          |          |          | 10µg E80_E |          |          |          |      | 50µg E80_E |          |          |          |          | 10µg E80_S |          |          |          |          | 50µg E80_S |          |          |          |          |
|--------|---------------------------|--------------|----------|----------|----------|----------|----------|------------|----------|----------|----------|------|------------|----------|----------|----------|----------|------------|----------|----------|----------|----------|------------|----------|----------|----------|----------|
|        | lg(1/dilution)            | mouse number | 1        | 2        | 3        | 4        | 5        | 1          | 2        | 3        | 4        | 5    | 1          | 2        | 3        | 4        | 5        | 1          | 2        | 3        | 4        | 5        | 1          | 2        | 3        | 4        | 5        |
|        | 1.30103                   |              | 49.68554 | 54.08805 | 70.90909 | 41.04478 | 65.48672 | 62.71357   | 90.35533 | 63.44538 | 77.70035 | 76   | 74.86339   | 64.85149 | 78.33334 | 76.1745  | 75       | 58.85714   | 71.78218 | 86.76471 | 62.64151 | 89.24731 | 82.29166   | 86.72566 | 94.90196 | 79.87805 | 89.74359 |
|        | 1.778151                  |              | 19.49685 | 22.64151 | 43.18182 | 26.1194  | 48.67257 | 55.7789    | 62.43655 | 50.42017 | 48.08362 | 71.2 | 50.81967   | 48.0198  | 50.41667 | 61.4094  | 59.25926 | 46.28571   | 50       | 61.39706 | 33.58491 | 86.02151 | 68.75      | 60.61947 | 66.27451 | 64.32927 | 76.92308 |
|        | 2.255272                  |              | 1        | 1        | 7.727273 | 15.29851 | 18.58407 | 23.61809   | 27.91878 | 32.35294 | 33.79791 | 50.4 | 48.63388   | 31.68317 | 34.16667 | 47.65101 | 49.07407 | 8.571428   | 33.16832 | 18.01471 | 19.24528 | 56.98925 | 39.58333   | 38.49557 | 43.13726 | 49.39024 | 58.11966 |
|        | 2.732394                  |              | 1        | 1        | 1        | 1        | 22.12389 | 14.57286   | 15.22843 | 14.70588 | 18.11847 | 39.2 | 12.56831   | 22.27723 | 5.833333 | 36.57718 | 38.88889 | 1          | 10.39604 | 1        | 9.433962 | 9.67742  | 18.75      | 19.9115  | 21.17647 | 36.28049 | 39.31624 |
|        | 3.209515                  |              | 1        | 1        | 1        | 1        | 1        | 16.58291   | 1        | 1        | 19.86063 | 11.2 | 1          | 2.970297 | 1        | 35.90604 | 24.07407 | 1          | 11.38614 | 1        | 1.886792 | 1        | 3.125      | 11.50443 | 11.76471 | 24.69512 | 30.76923 |
|        | 3.686636                  |              | 1        | 1        | 1        | 1        | 1        | 11.55779   | 1        | 1        | 7.665505 | 1    | 1          | 1        | 1        | 23.8255  | 1        | 1          | 4.455446 | 1        | 1.886792 | 1        | 1          | 1        | 1        | 19.20732 | 25.64103 |
