# Supplementary material for: Recombinant Zika virus envelope protein elicited protective immunity against Zika virus in immunocompetent mice
Source: PubMed Central journal article supplement (PMC5874044; doi:10.1371/journal.pone.0194860), 2018-03-28
Supplement: pone.0194860.s004.pdf [file pone.0194860.s004.pdf]

S4 Table. Original data for Fig 3

| Fig 5A Percentage of infected cells (%) |              |       |       |       |       |
|-----------------------------------------|--------------|-------|-------|-------|-------|
| DPI                                     | mouse number | 1     | 2     | 3     | 4     |
|                                         | 1            | 0.018 | 0.016 | 0.045 | 0.021 |
|                                         | 2            | 25.3  | 1.23  | 0.11  | 16.9  |
|                                         | 3            | 59.5  | 46.5  | 20    | 37    |
|                                         | 4            | 52.3  | 1.05  | 80.5  | 0.056 |
|                                         | 5            | 0.071 | 0.078 | 0.25  | 0.044 |

| Fig 5B Percentage of infected cells (%) |              |       |       |       |       |
|-----------------------------------------|--------------|-------|-------|-------|-------|
| DPI                                     | mouse number | 1     | 2     | 3     | 4     |
|                                         | 1            | 0.027 | 0.068 | 0.028 | 0.013 |
|                                         | 2            | 0.92  | 0.082 | 14.9  | 0.049 |
|                                         | 3            | 60.3  | 45.7  | 55.5  | 10.6  |
|                                         | 4            | 2.31  | 0.05  | 0.021 | 32    |
|                                         | 5            | 0.046 | 0.038 | 0.027 | 0.045 |

| Fig 5C Percentage of infected cells (%) |              |       |       |       |       |       |
|-----------------------------------------|--------------|-------|-------|-------|-------|-------|
| DPI                                     | mouse number | 1     | 2     | 3     | 4     | 5     |
|                                         | 1            | 0.029 | 0.02  | 28.9  | 0.026 | 0.022 |
|                                         | 2            | 0.092 | 0.7   | 36.1  | 33.5  | 0.45  |
|                                         | 3            | 50.3  | 63.1  | 54.7  | 33.3  | 53.2  |
|                                         | 4            | 77    | 61.3  | 3.46  | 77.1  | 82.1  |
|                                         | 5            | 31.6  | 0.049 | 0.054 | 0.065 | 2.63  |

| Fig 5D Percentage of infected cells (%) |              |       |       |       |       |       |
|-----------------------------------------|--------------|-------|-------|-------|-------|-------|
| DPI                                     | mouse number | 1     | 2     | 3     | 4     | 5     |
|                                         | 1            | 5.05  | 0.98  | 0.04  | 0.068 | 0.023 |
|                                         | 2            | 42.3  | 2.6   | 23.9  | 0.031 | 24.9  |
|                                         | 3            | 46.7  | 65.2  | 64.5  | 3.75  | 64.7  |
|                                         | 4            | 0.071 | 72    | 90.4  | 66.1  | 0.049 |
|                                         | 5            | 0.023 | 0.021 | 0.018 | 24.2  | 0.019 |

| Fig 5E Percentage of infected cells (%) |              |       |       |       |       |       |
|-----------------------------------------|--------------|-------|-------|-------|-------|-------|
| DPI                                     | mouse number | 1     | 2     | 3     | 4     | 5     |
|                                         | 1            | 1.69  | 2.47  | 0.019 | 0.027 | 0.029 |
|                                         | 2            | 17.3  | 43.9  | 0.025 | 0.042 | 20.6  |
|                                         | 3            | 62.3  | 48.6  | 0.039 | 0.041 | 54.1  |
|                                         | 4            | 0.85  | 0.048 | 0.031 | 0.053 | 0.04  |
|                                         | 5            | 0.045 | 0.071 | 0.047 | 0.056 | 0.064 |

| Fig 5F AUC |        |            |            |            |            |
|------------|--------|------------|------------|------------|------------|
|            | PBS    | 10µg E80 E | 10µg E80 S | 50µg E80 E | 50µg E80 S |
| mouse 1    | 143.21 | 137.14     | 91.61      | 63.57      | 81.32      |
| mouse 2    | 125.13 | 48.827     | 140.3      | 45.89      | 93.82      |
| mouse 3    | 108.74 | 100.76     | 178.8      | 70.45      | 0.128      |
| mouse 4    | 143.95 | 53.989     | 82.02      | 42.68      | 0.1775     |
| mouse 5    | 137.08 |            | 89.67      |            | 74.79      |

| Fig 5G Percentage of infected cells (%) |      |            |            |            |            |
|-----------------------------------------|------|------------|------------|------------|------------|
|                                         | PBS  | 10µg E80 E | 10µg E80 S | 50µg E80 E | 50µg E80 S |
| mouse 1                                 | 77   | 59.5       | 46.7       | 60.3       | 62.3       |
| mouse 2                                 | 63.1 | 46.5       | 72         | 45.7       | 48.6       |
| mouse 3                                 | 54.7 | 80.5       | 90.4       | 55.5       | 0.047      |
| mouse 4                                 | 77.1 | 37         | 66.1       | 32         | 0.056      |
| mouse 5                                 | 82.1 |            | 64.7       |            | 54.1       |

| Fig 5H Viremia days |     |            |            |            |            |
|---------------------|-----|------------|------------|------------|------------|
|                     | PBS | 10µg E80 E | 10µg E80 S | 50µg E80 E | 50µg E80 S |
| mouse 1             | 4   | 3          | 3          | 3          | 4          |
| mouse 2             | 3   | 3          | 4          | 1          | 3          |
| mouse 3             | 4   | 4          | 3          | 2          | 0          |
| mouse 4             | 3   | 2          | 3          | 2          | 0          |
| mouse 5             | 4   |            | 2          |            | 2          |
