# Supplementary material for: Recombinant Zika virus envelope protein elicited protective immunity against Zika virus in immunocompetent mice
Source: PubMed Central journal article supplement (PMC5874044; doi:10.1371/journal.pone.0194860), 2018-03-28
Supplement: pone.0194860.s005.pdf [file pone.0194860.s005.pdf]

S5 Table. Original data for Fig 6

| Fig 6A | Weight change (g) |           |           |           |           |            |           |           |           |            |           |           |           |            |           |           |           |            |           |           |           |           |           |
|--------|-------------------|-----------|-----------|-----------|-----------|------------|-----------|-----------|-----------|------------|-----------|-----------|-----------|------------|-----------|-----------|-----------|------------|-----------|-----------|-----------|-----------|-----------|
|        | DPI               | PBS       |           |           |           | 10ug E80_E |           |           |           | 50ug E80_E |           |           |           | 10ug E80_S |           |           |           | 50ug E80_S |           |           |           |           |           |
|        | mouse number      | 1         | 2         | 3         | 4         | 5          | 1         | 2         | 3         | 4          | 1         | 2         | 3         | 4          | 1         | 2         | 3         | 4          | 1         | 2         | 3         | 4         | 5         |
|        | 1                 | 0         | 0         | 0         | 0         | 0          | 0         | 0         | 0         | 0          | 0         | 0         | 0         | 0          | 0         | 0         | 0         | 0          | 0         | 0         | 0         | 0         | 0         |
|        | 2                 | -0.718735 | 3.632076  | 0         | -4.263758 | 1.53417    | -4.952216 | -3.131438 | -4.460303 | -2.031316  | 1.359649  | -4.504505 | 0.465549  | 0.925926   | 1.724881  | 0.133393  | -1.194539 | -2.389937  | 0.178571  | -1.315789 | 1.15942   | -2.556054 | -0.091075 |
|        | 3                 | -4.264494 | -2.783019 | -5.373276 | -10.21319 | -4.277081  | -8.07993  | -5.933251 | -8.876003 | -5.628438  | -1.535088 | -8.378378 | -1.769088 | -5.165692  | -3.363519 | -4.357492 | -6.271331 | -8.427673  | -0.714286 | -6.170599 | -1.690821 | -4.035874 | -2.322404 |
|        | 4                 | -10.3977  | -7.59434  | -11.65002 | -14.67526 | -11.29707  | -10.77324 | -8.899877 | -12.44425 | -10.11426  | -5        | -15       | -8.054004 | -9.649123  | -7.158258 | -7.381058 | -7.892491 | -11.2369   | -3.973214 | -8.121597 | -5.120773 | -4.26009  | -6.193079 |
|        | 5                 | -15.04552 | -9.198113 | -15.16881 | -18.2945  | -14.92329  | -10.03475 | -11.66049 | -13.2917  | -12.31485  | -5.964912 | -14.0991  | -10.70763 | -9.844054  | -12.89349 | -12.40551 | -14.37713 | -13.41719  | -5.758929 | -11.29764 | -7.05314  | -8.744394 | -8.105647 |
|        | 6                 | -19.50168 | -12.92453 | -19.73371 | -22.16163 | -18.596    | -10.64292 | -12.56696 | -16.72614 | -13.83834  | -11.49123 | -15.40541 | -14.6648  | -12.91423  | -14.01466 | -15.38461 | -16.59556 | -19.32914  | -8.125    | -14.15608 | -6.376812 | -7.757847 | -9.608378 |
|        | 7                 | -15.38093 | -10.99057 | -17.73657 | -18.59197 | -17.43375  | -6.950478 | -7.622579 | -12.75647 | -8.167583  | -9.649123 | -14.63964 | -12.80261 | -10.47758  | -14.10091 | -14.13962 | -15.40102 | -15.30398  | -3.839286 | -8.711433 | -2.125604 | -4.304933 | -5.555555 |
|        | 8                 | -10.54145 | -8.773585 | -14.45554 | -11.1056  | -11.80946  | -8.03649  | -7.045735 | -7.805531 | -7.575116  | -8.070175 | -12.79279 | -10.28864 | -9.356725  | -9.616214 | -12.18319 | -13.05461 | -12.57862  | -4.866071 | -9.845735 | -2.753623 | -5.201794 | -4.007286 |
|        | 9                 | -7.85817  | -6.556604 | -11.65002 | -11.15518 | -11.99442  | -7.732407 | -6.139266 | -6.378234 | -9.098603  | -7.236842 | -12.56757 | -7.821229 | -8.625731  | -7.20138  | -9.915518 | -11.04949 | -11.44654  | -4.241071 | -7.667877 | -4.68599  | -3.228699 | -3.688524 |
|        | 10                | -4.98323  | -5.896226 | -11.45982 | -9.816559 | -11.52952  | -8.688097 | -7.086938 | -8.608385 | -9.987305  | -8.596491 | -11.93694 | -7.402235 | -8.576998  | -8.408797 | -10.89373 | -11.94539 | -12.66247  | -5        | -9.664247 | -6.859903 | -5.650224 | -3.324226 |
|        | 11                | -4.98323  | -6.556604 | -11.69757 | -9.023302 | -11.11111  | -9.77411  | -7.540173 | -9.634255 | -12.10326  | -7.982456 | -11.48649 | -6.79702  | -7.699805  | -9.271237 | -11.69409 | -13.13993 | -13.58491  | -4.821429 | -9.165154 | -6.280193 | -5.470852 | -5.054645 |
|        | 12                | -6.468615 | -6.792453 | -13.21921 | -8.824987 | -11.94793  | -10.7298  | -5.933251 | -9.85727  | -10.66441  | -8.684211 | -11.62162 | -7.774674 | -9.11306   | -10.43553 | -12.6723  | -15.3157  | -14.84277  | -3.883929 | -8.802177 | -6.038647 | -2.825112 | -4.735883 |
|        | 13                | -6.516531 | -6.698113 | -13.59962 | -9.41993  | -11.11111  | -9.339705 | -7.993408 | -10.79393 | -9.818027  | -7.938597 | -9.72973  | -7.216015 | -7.261209  | -9.874946 | -13.07248 | -14.24915 | -15.05241  | -2.1875   | -9.528131 | -6.618358 | -2.331839 | -5.601093 |
|        | 14                | -5.893627 | -4.009434 | -12.69615 | -9.618245 | -9.669921  | -6.429192 | -7.704986 | -8.697592 | -11.46847  | -7.017544 | -7.837838 | -6.098696 | -6.530214  | -8.926261 | -11.02712 | -10.75085 | -12.49476  | -5.580357 | -10.75318 | -6.908213 | -3.408072 | -5.373406 |
