# Supplementary material for: Recombinant Zika virus envelope protein elicited protective immunity against Zika virus in immunocompetent mice
Source: PubMed Central journal article supplement (PMC5874044; doi:10.1371/journal.pone.0194860), 2018-03-28
Supplement: pone.0194860.s006.pdf [file pone.0194860.s006.pdf]

S6 Table. Original data for Fig 7

| Fig 7A |              | Percentage of infected cells (%) |      |      |
|--------|--------------|----------------------------------|------|------|
| DPI    | mouse number | 1                                | 2    | 3    |
|        | 1            | 0.79                             | 1.23 | 0.2  |
|        | 2            | 52.9                             | 11.1 | 0.8  |
|        | 3            | 63.7                             | 23.4 | 33.4 |
|        | 4            | 8.05                             | 2.51 | 3.73 |
|        | 5            | 0.17                             | 0.16 | 0.16 |

| Fig 7B |              | Percentage of infected cells (%) |      |       |
|--------|--------------|----------------------------------|------|-------|
| DPI    | mouse number | 1                                | 2    | 3     |
|        | 1            | 1.53                             | 0.26 | 0.094 |
|        | 2            | 38.1                             | 10.1 | 32.5  |
|        | 3            | 57                               | 16   | 1.72  |
|        | 4            | 0.18                             | 0.13 | 0.092 |
|        | 5            | 0.21                             | 0.19 | 0.24  |

| Fig 7C |              | Percentage of infected cells (%) |      |      |
|--------|--------------|----------------------------------|------|------|
| DPI    | mouse number | 1                                | 2    | 3    |
|        | 1            | 0.11                             | 0.12 | 0.16 |
|        | 2            | 21.2                             | 4.14 | 0.13 |
|        | 3            | 27.7                             | 0.97 | 0.79 |
|        | 4            | 0.12                             | 0.13 | 0.27 |
|        | 5            | 0.19                             | 0.15 | 0.13 |

| Fig 7D  |       | AUC   |       |  |
|---------|-------|-------|-------|--|
|         | PBS   | E80_E | E80_S |  |
| mouse 1 | 125.1 | 96.15 | 49.17 |  |
| mouse 2 | 37.71 | 26.46 | 5.375 |  |
| mouse 3 | 38.11 | 34.48 | 1.335 |  |

| Fig 7E  |      | Percentage of infected cells (%) |       |  |
|---------|------|----------------------------------|-------|--|
|         | PBS  | E80_E                            | E80_S |  |
| mouse 1 | 63.7 | 57                               | 27.7  |  |
| mouse 2 | 23.4 | 16                               | 4.14  |  |
| mouse 3 | 33.4 | 32.5                             | 0.79  |  |

| Fig 7F  |     | Viremia days |       |  |
|---------|-----|--------------|-------|--|
|         | PBS | E80_E        | E80_S |  |
| mouse 1 | 4   | 3            | 2     |  |
| mouse 2 | 4   | 2            | 2     |  |
| mouse 3 | 3   | 2            | 1     |  |
