# Supplementary material for: Recombinant Zika virus envelope protein elicited protective immunity against Zika virus in immunocompetent mice
Source: PLoS One. 2018 Mar 28;13(3):e0194860. doi: 10.1371/journal.pone.0194860 (PMC5874044; doi:10.1371/journal.pone.0194860)
Supplement: S3 Table — (PDF) [file pone.0194860.s003.pdf]

|        |                     |              |    |    |     |  |     |     |      |  |     |     |     |  |      |      |      |  |  |
|--------|---------------------|--------------|----|----|-----|--|-----|-----|------|--|-----|-----|-----|--|------|------|------|--|--|
| Fig 4B | Spots/million cells |              |    |    |     |  |     |     |      |  |     |     |     |  |      |      |      |  |  |
|        |                     | stimulation  |    |    | PBS |  |     |     | DENV |  |     |     | HIV |  |      |      | ZIKV |  |  |
|        |                     | mouse number | 1  | 2  | 3   |  | 1   | 2   | 3    |  | 1   | 2   | 3   |  | 1    | 2    | 3    |  |  |
|        | PBS                 |              | 3  | 10 | 5   |  | 112 | 75  | 132  |  | 13  | 32  | 23  |  | 8    | 8    | 8    |  |  |
|        | E80_E               |              | 10 | 12 | 17  |  | 127 | 173 | 118  |  | 147 | 150 | 227 |  | 2040 | 2510 | 2267 |  |  |
|        | E80_S               |              | 13 | 5  | 5   |  | 420 | 148 | 262  |  | 42  | 12  | 20  |  | 968  | 1172 | 508  |  |  |

|        |                                     |   |       |       |       |   |       |       |       |   |       |       |       |   |       |       |       |  |
|--------|-------------------------------------|---|-------|-------|-------|---|-------|-------|-------|---|-------|-------|-------|---|-------|-------|-------|--|
| Fig 4C | Percentage of IL-2+ CD4 T cells (%) |   |       |       |       |   |       |       |       |   |       |       |       |   |       |       |       |  |
|        | stimulation                         |   | PBS   |       |       |   | DENV  |       |       |   | HIV   |       |       |   | ZIKV  |       |       |  |
|        | mouse number                        | 1 | 2     | 3     |       | 1 | 2     | 3     |       | 1 | 2     | 3     |       | 1 | 2     | 3     |       |  |
|        | PBS                                 |   | 0.017 | 0.004 | 0.019 |   | 0.007 | 0.021 | 0.022 |   | 0.004 | 0     | 0.004 |   | 0.017 | 0.013 | 0.02  |  |
|        | E80_E                               |   | 0.014 | 0.022 | 0.018 |   | 0.015 | 0.013 | 0.016 |   | 0.006 | 0.015 | 0.011 |   | 0.051 | 0.14  | 0.089 |  |
|        | E80_S                               |   | 0.012 | 0.033 | 0.011 |   | 0.011 | 0.032 | 0.012 |   | 0.013 | 0.008 | 0.004 |   | 0.048 | 0.051 | 0.035 |  |
